# Supplementary material
Source: publisher site journal article supplement (https://www.dovepress.com/article/265121)

Fig. S1 Flowchart of the data selection process. We finally enrolled in 351 samples for further analysis.


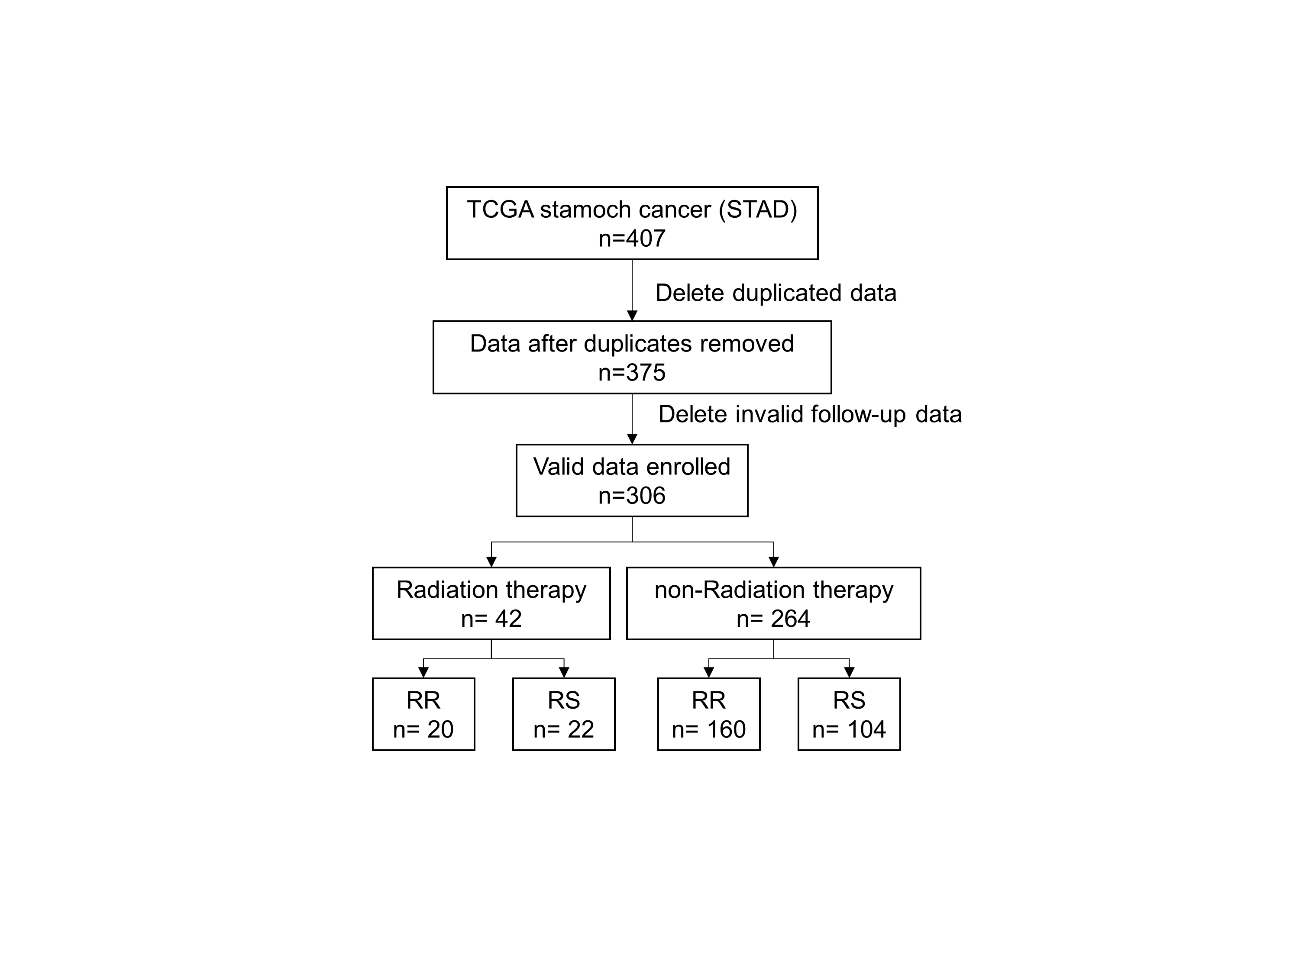


Fig. S2 Clustering effect evaluated by tracking plot and cluster-consensus values. a. The tracking plot described data stability after clustering. The results showed that the color of clustering samples altered under different k values, indicating that the data are stable. b. When k=2, pairwise consensus values were balanced.


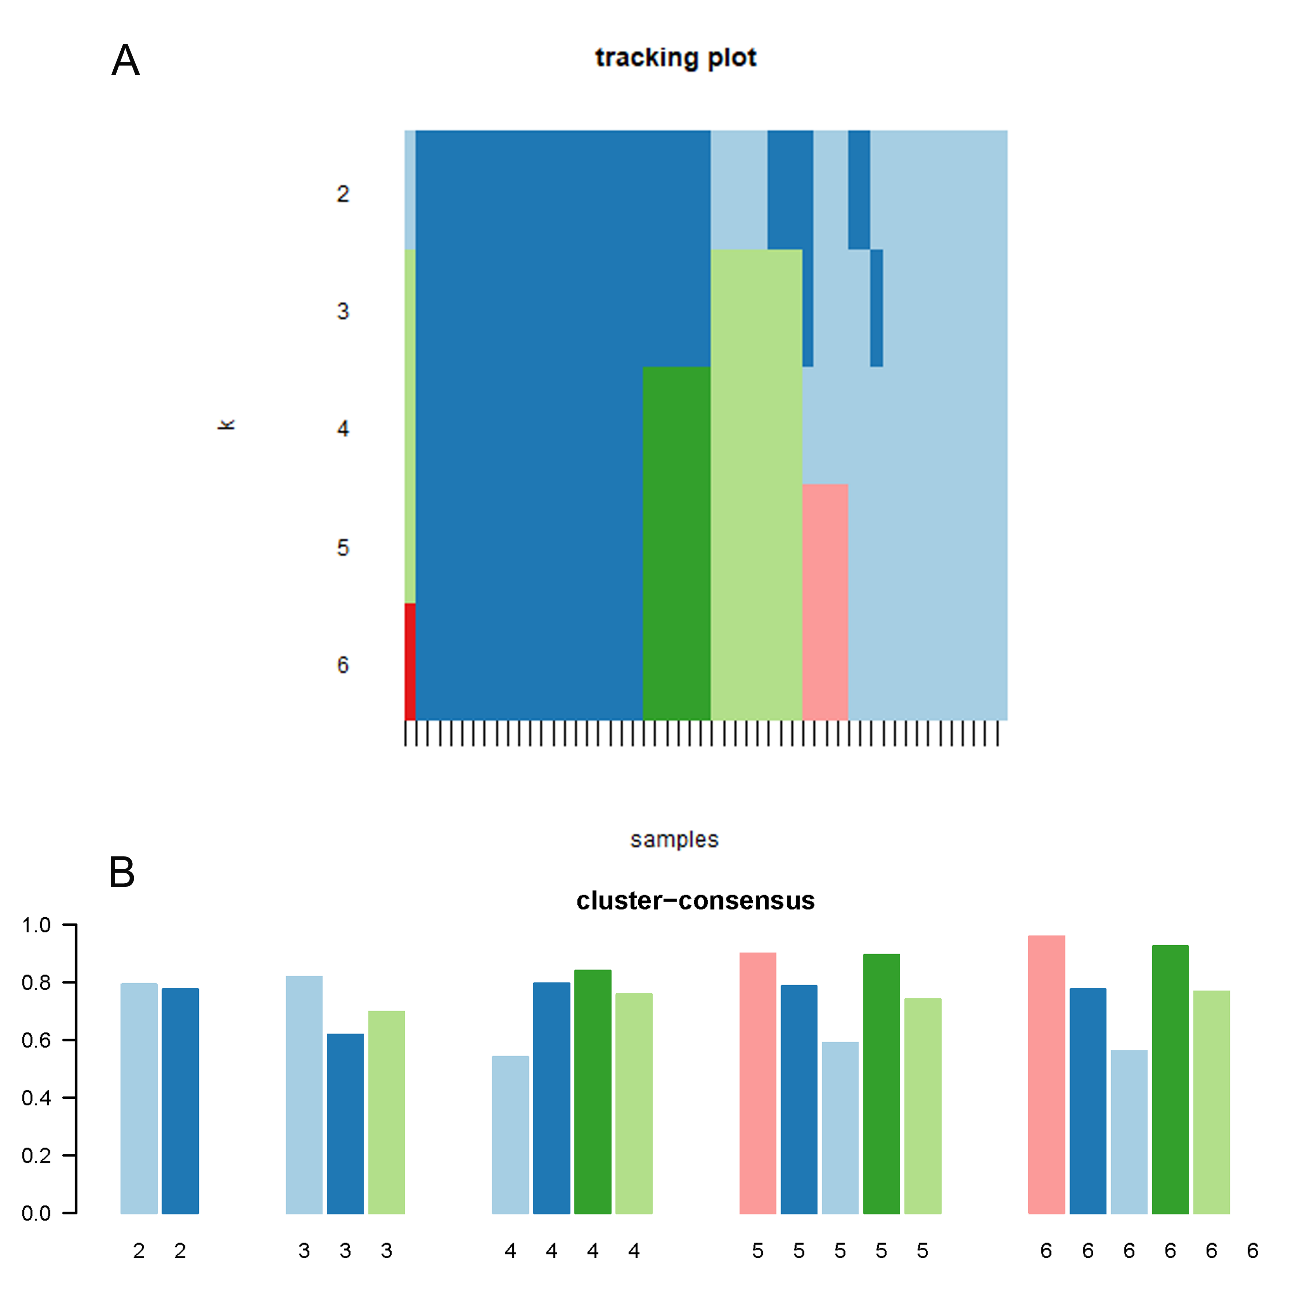


Fig. S3 Different CD19 status in RR and RS. a. Expression levels of CD19 in RR and RS of gastric cancer. b. Heatmap shows the correlation between hub radiosensitivity genes and CD19 status in RR and RS of GC.


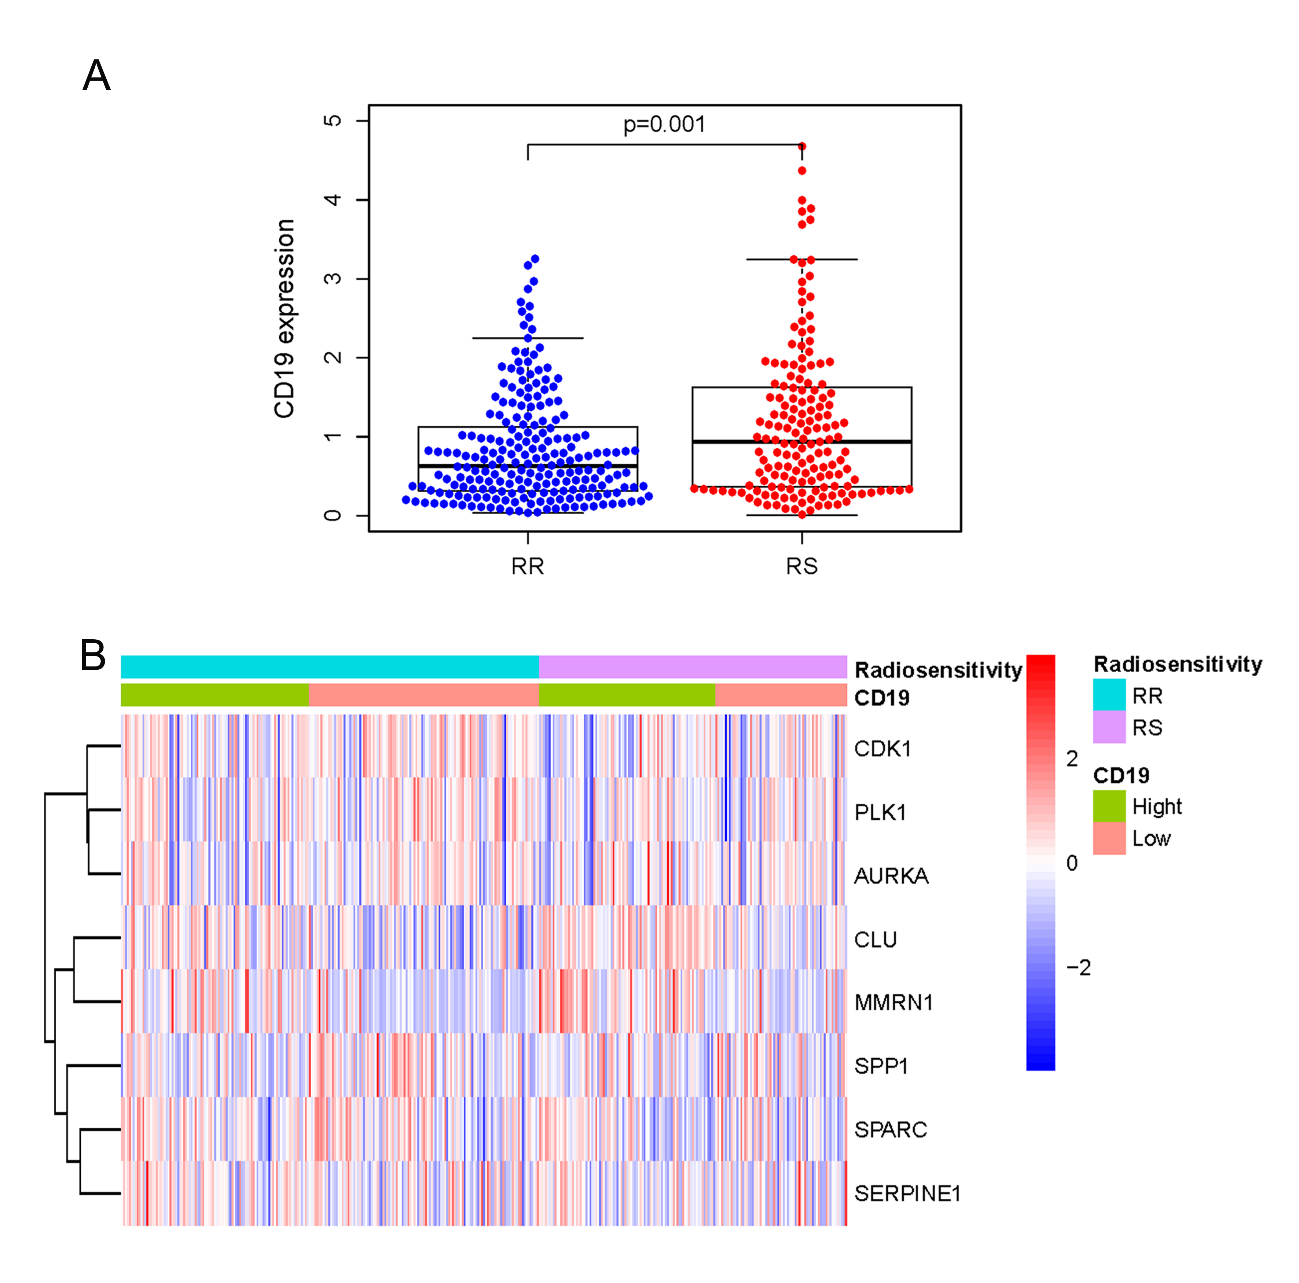


Fig. S4 Prediction value and expression of CKD1 and AURKA in GC from the GEO database. a. The survival curve shows a low-risk group presented by the blue line, which indicated a higher survival probability than the high-risk group presented by the red line. The survival probability declined dramatically within 5 years in the high-risk group. b. Both genes were highly expressed in the low-risk group. The proportion of the T4 stage in the high-risk group was high.


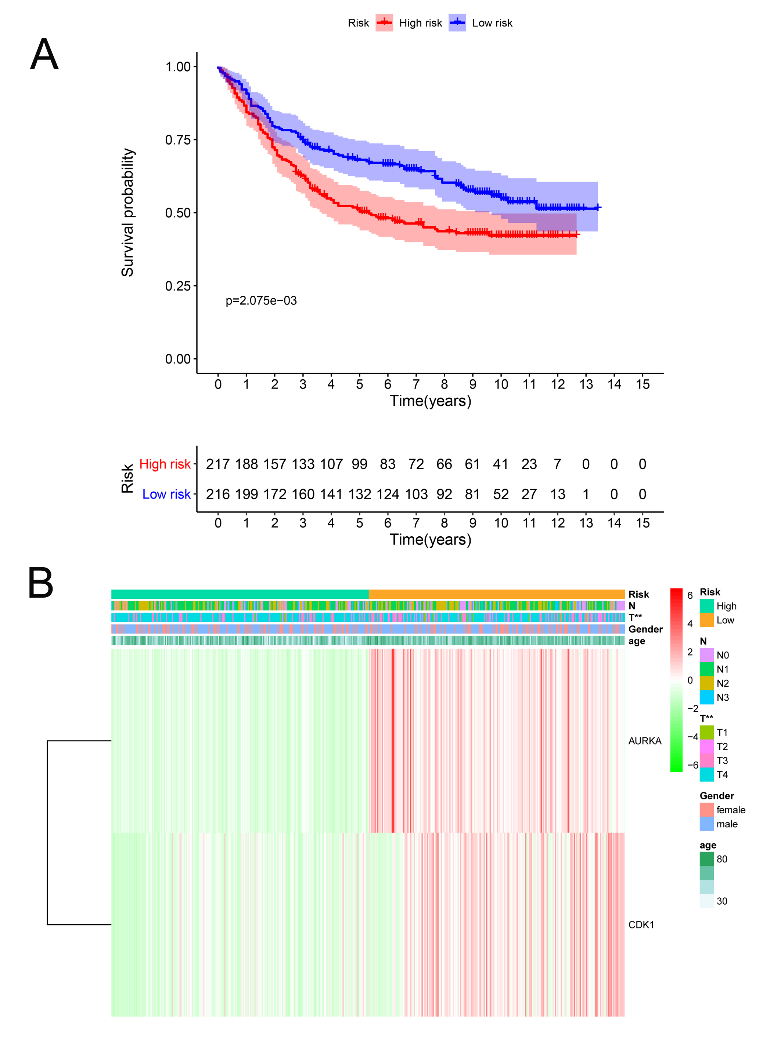

Supplement: Supplementary file 1 [file get_supplementary_file.php]
